# Supplementary material for: HCOOH distributions from IASI for 2008–2014: comparison with ground-basedFTIR measurements and a global chemistry-transport model
Source: Copernicus journal article supplement (doi:10.5194/acp-16-8963-2016), 2016-07-21
Supplement: Supplementary file [file acp-16-8963-2016-supplement-title-page.pdf › acp-16-8963-2016-supplement-title-page.pdf]

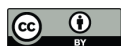

## *Supplement of*

# **HCOOH distributions from IASI for 2008–2014: comparison with ground-based FTIR measurements and a global chemistry-transport model**

**Matthieu Pommier et al.**

*Correspondence to:* Matthieu Pommier (matthieup@met.no)

- acp-16-8963-2016-supplement-title-page.pdf
- supplement\_v2
  - .access^
  - FigS1\_anim20082014\_month.mpeg
  - HCOOHretrieval\_supplement.pdf

The copyright of individual parts of the supplement might differ from the CC-BY 3.0 licence.
